# Supplementary material for: The Role of a Curved Electrode with Controllable Direction in the Radiofrequency Ablation of Liver Tumors Behind Large Vessels
Source: Springer Nature journal article supplement (doi:10.1007/s00270-019-02182-0), 2019-02-13
Supplement: MOESM1 [file 16468834]

**Supplements**


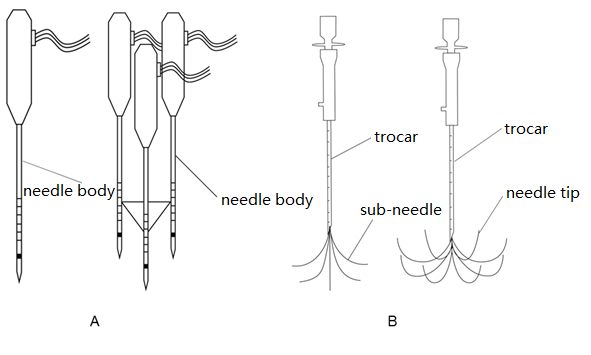


**Figure S1. Schematic diagram of conventional radiofrequency ablation electrodes.**

A. Single-needle straight electrode and multiple straight electrodes.

B. Multi-tines expandable electrodes.

**
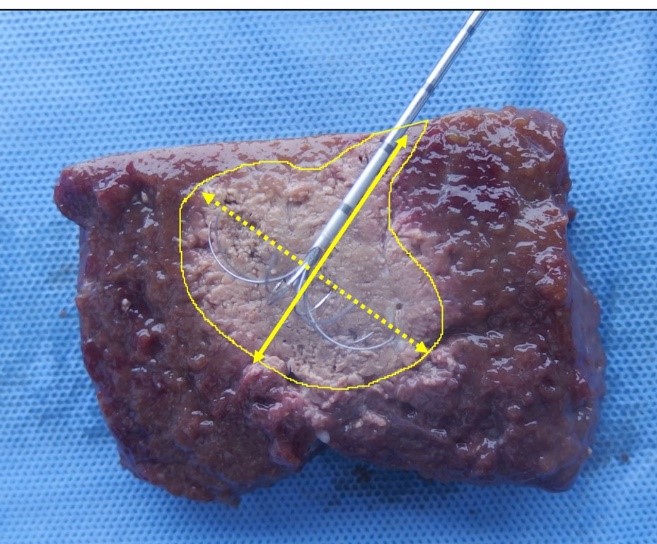
**

**Figure S2. Measurement of the radiofrequency ablated area in ex vivo experiments.**

Photo of liver specimen in the transverse plane parallel to the electrode insertion axis. Solid arrow indicates parallel diameter (Dp); dotted arrow indicates vertical diameter (Dv). The range of the ablation zone was drawn by hands and auto calculated by imaging analysis software.


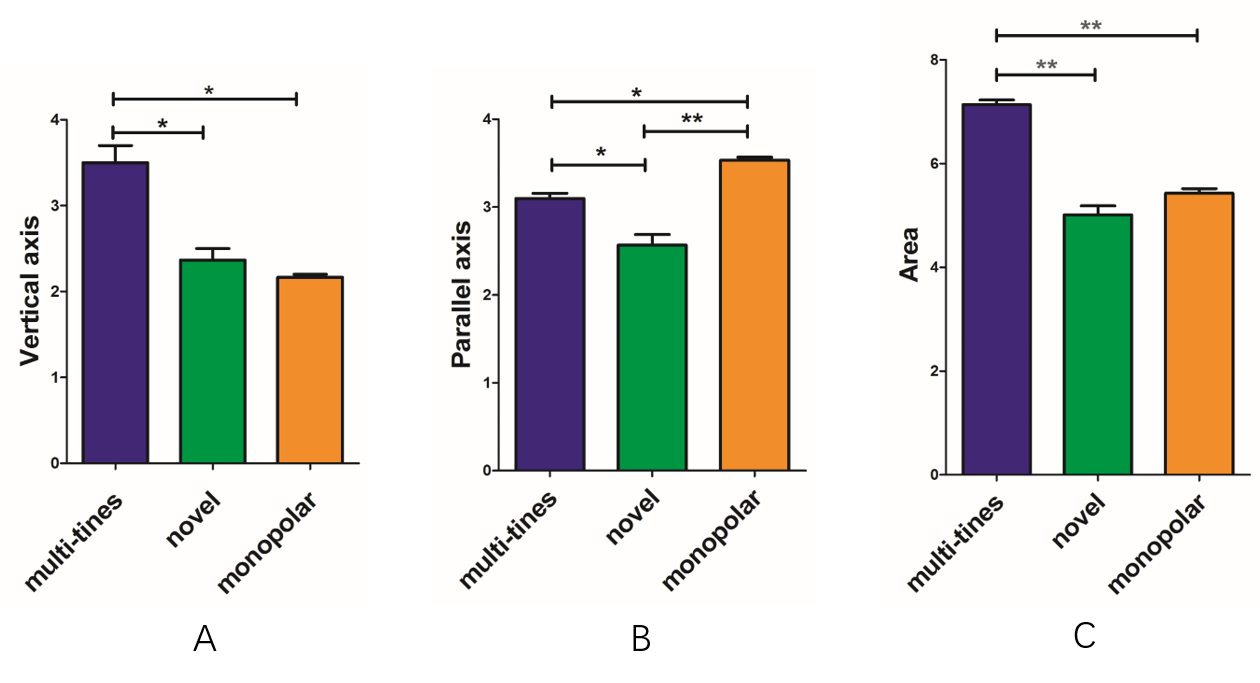


**Fig S3. Comparison of the size of ablation zone in gross pathology samples with different electrodes with 3 cm tines.**

A: The ablation Dv of the multi-tines expandable electrode group were statistically longer than the novel curved electrode group (P=0.001) and the monopolar straight electrode group (P=0.001).

B: The ablation Dp of the monopolar straight electrode group was statistically longer than those of the multi-tines expandable electrode group (P=0.008) and the novel curved electrode group (P<0.001).

C: The ablation area of the multi-tines expandable electrode group were statistically larger than that of the novel curved electrode group (P<0.001) and monopolar straight electrode group (P<0.001).
